1                   **Shape Analysis of the Human Association Pathways**

2   **Authors:** Fang-Cheng Yeh<sup>1,2,\*</sup>

3   **Affiliations:**

4   <sup>1</sup>Department of Neurological Surgery, University of Pittsburgh School of Medicine, Pittsburgh,  
5   Pennsylvania, United States

6   <sup>2</sup>Department of Bioengineering, University of Pittsburgh, Pittsburgh, Pennsylvania, United States

7   \*Correspondence to:

8   Fang-Cheng Yeh, M.D. Ph.D.

9   Department of Neurological Surgery,

10   Department of Bioengineering,

11   University of Pittsburgh, Pittsburgh, Pennsylvania

12   Email: [frank.yeh@pitt.edu](mailto:frank.yeh@pitt.edu)

13

14

15 **Abstract**

16 Shape analysis has been widely used in digital image processing and computer vision, but they have not  
17 been utilized to compare the structural characteristics of the human association pathways. Here we used  
18 shape analysis to derive length, area, volume, and shape metrics from diffusion MRI tractography and  
19 utilized them to study the human association pathways. An augmented fiber tracking combined with  
20 automatic segmentation was used to improve reproducibility in tractography. The reliability analysis  
21 showed that shape descriptors achieved moderate to good test-retest reliability. Further analysis on  
22 association pathways showed left dominance in the arcuate fasciculus, cingulum, uncinate fasciculus,  
23 frontal aslant tract, and right dominance in the inferior fronto-occipital fasciculus and inferior longitudinal  
24 fasciculus. The superior longitudinal fasciculus has a mixed lateralization profile with different metrics  
25 showing either left or right dominance. The analysis of between-subject variations shows that the overall  
26 layout of the association pathways does not vary a lot across subjects, as shown by low between-  
27 subject variation in length, span, diameter, and radius. In contrast, the area of the pathway innervation  
28 region has a considerable between-subject variation. A follow-up analysis is warranted to thoroughly  
29 investigate the nature of population variations and their structure-function correlation.

30 **Keywords:** diffusion MRI, tractography, automatic fiber tracking, shape analysis, shape descriptor.

## 31 **Introduction**

32 Deciphering the structural layout of the human brain has been a challenging goal to understand how  
33 structure defines the brain function (DeFelipe, 2010). The first connectome study identified structural  
34 connection using diffusion MRI fiber tracking (Sporns et al., 2005) and formulated brain connections as  
35 a graph to reveal the network topology (Bullmore and Sporns, 2009). Further studies have correlated  
36 structural connectivity with brain function in the healthy population or disease population (Fornito et al.,  
37 2015). The network analysis tackled the structure-function correlation from a panoramic view, but the  
38 shape characteristics and topological pattern of the connecting bundles were mostly ignored, particularly  
39 the association pathways in the human brain that control most of the cognitive functions. While there are  
40 existing shape analysis studies focused on specific applications, (Corouge et al., 2004; Glozman et al.,  
41 2018; Kitchell et al., 2018), there is yet a comprehensive study utilizing shape analysis to investigate the  
42 structural characteristics of the human association pathways.

43 Here we aim to bridge this information gap by applying a comprehensive shape analysis, including length,  
44 area, volume, and shape metrics, to investigate the shape characteristics of the human association  
45 pathways. Shape analysis has been widely used in computer vision in a variety of applications to achieve  
46 imaging understanding of an object (Costa and Cesar Jr, 2000). The analysis provides the “shape  
47 descriptor”—a quantitative measurement that describes one part of the shape characteristics as length,  
48 area, and volume. Leveraging shape analysis to investigate tractography, however, faces two technical  
49 challenges. First, the existing shape analysis is designed for 2D pixel-based or 3D voxel-based images,  
50 whereas tractography is a set of coordinate sequences plotting the simulated routes of brain connections.  
51 The definition of shape descriptors, such as length, area, and volume metrics, requires a substantial  
52 revision to fit into the tractography context. Second, the reproducibility of tractography has long been an

53 ongoing issue (Rheault et al., 2020). Without a reliable and reproducible tractography input, the result of  
54 shape analysis will be meaningless due to “garbage in, garbage out.”

55 In this study, we first tackled the reproducibility issue using “parameter saturation,” a strategy that  
56 saturates parameter space by using millions of parameter combinations instead of a simple parameter  
57 setting for the tractography. Then we combined fiber tracking with an automatic segmentation method  
58 based on an expert-vetted tractography atlas (Yeh et al., 2018) to isolate target pathways and exclude  
59 irrelevant or false connections. After segmentation, we applied an automatic pruning method called  
60 topology-informed pruning (Yeh et al., 2019) to eliminate possible false connections. We integrated these  
61 three strategies to map 14 association pathways on a test-retest dataset from the human connectome  
62 projects (n=44).

63 Then we introduced the shape descriptors for the tractography. Figure 1 illustrates the calculation using  
64 the left arcuate fasciculus as an example. Figure 1a shows the quantification of the length metrics,  
65 including length, span, diameters of the bundle, and radius of the innervation regions. Figure 1b shows  
66 the area metrics, including the area of the entire track surface and area of the two end surfaces. Figure  
67 1c shows the volume metrics, including total track volume and trunk volume. Based on these metrics, we  
68 further derived “shape metrics,” which are unit free indices, including curl, elongation, and irregularity, to  
69 describe the shape characteristics of the association pathways. We examined the reliability of these  
70 metrics using the intra-class correlations. This reliability results allowed us to ignore findings with poor  
71 reproducibility to ensure the robustness of the results. Then we derived the distribution of shape  
72 descriptors to reveal their left-right asymmetry and between-subject variations for the association  
73 pathways.

## 74 **Material and Methods**

### 75 **MRI acquisitions**

76 The test-retest diffusion MRI data were acquired by the Human Connectome Project database (WashU  
77 consortium)(Glasser et al., 2016). A total of 44 subjects had repeat diffusion MRI scans. 24 of them were  
78 female, and 20 of them were male. The age range was 22- to 35-year-old, and the average age was 30.3.  
79 Only one subject was left-handed. The data were acquired using a multishell diffusion scheme with three  
80 b-values at 1000, 2000, and 3000 s/mm<sup>2</sup>. Each shell had 90 sampling directions. The spatial resolution  
81 was 1.25 mm isotropic. The acquisition parameters are detailed in the consortium paper (Glasser et al.,  
82 2016).

### 83 **Diffusion MRI Fiber tracking**

84 The diffusion data were first rotated and interpolated to the ICBM2009 T1W space at 1mm. Here the  
85 rotation used a rigid-body transformation without a nonlinear deformation so that the shape features were  
86 preserved. The b-table was also rotated accordingly. The purpose of this spatial transformation was to  
87 facilitate a direct comparison of the tractography between the repeat scans. The rotated data were then  
88 reconstructed using generalized q-sampling imaging (Yeh et al., 2010) with a diffusion sampling length  
89 ratio of 1.7. The b-table was checked by an automatic quality control routine to ensure its accuracy  
90 (Schilling et al., 2019).

91 We mapped 14 association pathways, including the left and right arcuate fasciculus (AF), cingulum (C).  
92 frontal aslant tract (FAT), inferior fronto-occipital fasciculus (IFOF), inferior longitudinal fasciculus (ILF),  
93 superior longitudinal fasciculus (SLF), and uncinate fasciculus (UF). The SLF here included “SLF II” and  
94 “SLF III,” as they often form a continuous sheet structure together. “SLF I” was not included because it is  
95 often separated from the other two SLF bundles and closely sided with cingulum. The starting region of

96 the fiber tracking (a.k.a. the seeding region) was defined using the corresponding white matter regions in  
97 the HCP842 tractography atlas (Yeh et al., 2018) (nonlinearly registered to the subject's native space).  
98 To cope with the reproducibility problem in tractography, we saturated the tracking parameters using a  
99 random generator to select a combination of fiber tracking parameters within a working range. The  
100 tracking parameters included the anisotropy threshold, angular threshold, step size (a.k.a. the  
101 propagation distance). The anisotropy threshold was randomly selected between 0.5 and 0.7 of the  
102 Otsu's threshold (Otsu, 1979). The angular threshold was randomly selected between 15 to 90 degrees.  
103 The step size was randomly selected between 0.5 to 1.5 voxel distance. The random generator was  
104 based on a uniform distribution to select a value from the above parameter range. For each of the 14  
105 association pathways, we initiated 5,000,000 tracking iterations, with each iteration having a unique  
106 sample of the parameter combination. The fiber tracking was conducted using a deterministic fiber  
107 tracking algorithm (Yeh et al., 2013).

## 108 **Automatic segmentation and pruning**

109 The generated tracks were further filtered by automatic segmentation and pruning. The track  
110 segmentation was based on the HCP842 tractography atlas (Yeh et al., 2018). For each trajectory, we  
111 calculated its Hausdorff distance with all trajectories in the tractography atlas (nonlinearly wrapped to the  
112 subject space). If the shortest distance was found at a trajectory matching our tracking target, and the  
113 distance was smaller than 16 mm, then the trajectory was selected. All selected trajectories were then  
114 filtered by topology-informed pruning (TIP)(Yeh et al., 2019) with 20 iterations to remove noisy fibers. For  
115 each diffusion MRI scan, we successfully obtained all 14 association pathways, except for one subject,  
116 the right arcuate fasciculus was too thin, and pruning iteration was reduced to 10, and in two other  
117 subjects, no track was selected in automatic segmentation for the right arcuate fasciculus (both test and  
118 retest scans). Further investigations into these two subjects found that the initial fiber tracking did

119 generate numerous pathways from the right arcuate fasciculus area, but subsequent tract segmentation  
120 categorized them as right superior longitudinal fasciculus as the trajectories did not reach the right  
121 superior temporal lobe. Thus the analysis related to the right arcuate fasciculus excluded these two  
122 subjects. For all track bundles, the shape characteristics were quantified using the following shape  
123 analysis. The analysis was conducted on the Pittsburgh Supercomputing Center provided through the  
124 XSEDE resource (Towns et al., 2014). The source code is available at <http://dsi-studio.labsolver.org> with  
125 documentation to ensure the reproducibility of this study.

## 126 **Shape analysis**

127 Table 1 lists the shape descriptors and their definition. A fiber bundle is a set of streamline trajectories  
128 that can be represented as 3D coordinate sequences:  $\{v_i(t) \mid i = 1, 2, 3, \dots, n\}$ . Here  $n$  is the total number  
129 of tracks,  $v_i(t)$  is a sequence of 3D coordinates representing the trajectory of a track.  $t$  is a discrete  
130 variable from 1 to  $m_i$ , where  $m_i$  is the number of the coordinates. The length of a fiber bundle is thus  
131 defined as follows:

$$132 \quad length = \frac{1}{n} \sum_{i=1}^n \sum_{t=1}^{m_i-1} \|v_i(t) - v_i(t+1)\|_2 \quad (1)$$

133 The span is defined as:

$$134 \quad span = \sum_{i=1}^n \|v(1) - v(m_i)\|_2 \quad (2)$$

135 curl is then defined as:

$$136 \quad curl = \frac{length}{span} \quad (3)$$

137 Curl has a range of  $[1, \infty)$ . A track bundle with a big curl value tends to have a curvy shape, whereas a  
138 straight line has a curl value of 1.

139 Then we voxelized tracks to carry out further shape analysis. All trajectories were first resampled so that  
140 for any two consecutive coordinates in any track,  $\|v_i(t) - v_i(t + 1)\|_2$  was smaller than the voxel size.  
141 This resampling allowed us to directly “voxelize” tracks by rounding up all coordinates and removing  
142 repeat voxels. To minimize discretization error, we multiplied track coordinates by 4 before rounding up,  
143 and any further metrics calculation will consider this scaling effect. The voxelized tracks could be  
144 represented by a set of unique voxel coordinates denoted as  $T = \{V_i \mid i = 1, 2, 3, \dots, N\}$ , where  $N$  is the  
145 total number of unique voxel coordinates. The total track volume could be estimated by the following:

$$146 \quad \text{volume} = N \times \text{voxel size} \quad (4)$$

147 Note that due to our previous scaling, the voxel size was  $4^3$  times smaller than the raw DWI voxel size.  
148 The bundle diameter was then approximated using a cylinder model:

$$149 \quad \text{diameter (mm)} = 2 \sqrt{\frac{\text{volume}}{\pi \times \text{length}}} \quad (5)$$

150 The diameter can be used to calculate elongation as a shape metric:

$$151 \quad \text{elongation} = \frac{\text{length}}{\text{diameter}} \quad (6)$$

152 To calculate track surface area, we converted the track voxel set  $T$  to a 3D volume  $V(x, y, z)$ , whereas  
153  $V(x, y, z) = 1$  if  $V(x, y, z) \in T$  and 0 otherwise. This 3D volume enabled us to use morphology operation  
154 to identify the “surface voxel,” defined as a non-zero voxel that connects to at least one zero-valued voxel  
155 among its 26 neighboring voxels. The surface area was then estimated as follows:

$$156 \quad \text{surface area} = \text{number of surface voxels} \times \text{voxel spacing}^2 \quad (8)$$

157 Based on a cylinder model, the irregularity of the surface was then defined as



$$158 \quad \text{irregularity} = \frac{\text{surface area}}{\pi \times \text{diameter} \times \text{length}} \quad (9)$$

159 A surface area much larger than the expected cylinder surface suggests higher shape irregularity.

160 The rest of the shape analysis then utilized the two end surfaces of a track bundle. One obstacle for end  
161 surface analysis was that the coordinates of a track could be sequenced in two opposite directions  
162 (antegrade or retrograde), and correctly grouping the endpoints into two “end surfaces” required  
163 additional clustering steps. To handle it, we used k-means clustering algorithm with  $k=2$  and modified it  
164 to satisfy the constraint that the endpoints of the same track will always be in the different clusters.  
165 Specifically, all  $v_i(1)$  was first assigned to cluster 1 and all  $v_i(m_i)$  to cluster 2. Then we computed the  
166 mean coordinate for each cluster, and for each track, we re-clustered its two endpoints again using their  
167 distance to the mean coordinates. All tracks were repeatedly re-clustered until there was no cluster  
168 change for all the endpoints. The coordinates of the clustered endpoints were then rounded up to remove  
169 repeat voxel coordinates. This generated two unique sets of discrete voxel coordinates:  $E_1 = \{V\}$  and  
170  $E_2$ , each of them denoting the voxelized end surfaces of the track bundle. We further checked the mean  
171 coordinates of  $E_1$  and  $E_2$  and figure out which of the x-, y-, or z-dimension has the largest distance  
172 between the mean coordinates. Without loss of generality, we assigned  $E_2$  to be the end surface that  
173 had a larger coordinate value in at this dimension (posterior or superior end of a bundle). The area of  $E_1$   
174 or  $E_2$  was then calculated as follows:

$$175 \quad \text{area of an end surface} = (\text{number of voxels in the surface set}) \times (\text{voxel spacing})^2 \quad (10)$$

176 The area was calculated separately for each of the end surfaces. The radius of an end surface was then  
177 calculated by modeling it as a circle, which has a radius equal to 1/5 of the mean distance to the center:

$$178 \quad \text{radius} = 1.5 \times (\text{mean distance of voxels to the center}) \quad (11)$$

179 The irregularity was also calculated as follows using a circle model:

$$180 \text{ irregularity of an end surface} = \frac{\pi \times \text{radius}^2}{\text{area of the end surface}} \quad (12)$$

181 The irregularity of a circle is 1, whereas any protrusion or intrusion will increase the irregularity. Last, the  
182 end surface coordinates will be used to define the “trunk” of a bundle. We first converted  $E_1$  and  $E_2$  into  
183 two 3D volumes of 0-1 valued voxels, respectively. The converted volumes were then analyzed by 3D  
184 connected component analysis to isolate the largest region of the surface. The two generated regions  
185 were then used as two regions of interest to isolate the main trunk of the fiber bundle and calculate its  
186 volume.

187 For each shape descriptor, the test-retest reliability was calculated using one-way random, single  
188 measures intraclass correlation (ICC 1-1). The median value of descriptors from 14 bundles was identified  
189 as an overall indicator of the performance. The between-subject variations of each descriptor were  
190 quantified using the absolute deviation from the median further divided by the median to facilitate  
191 comparison.

## 192 **Results**

### 193 **Augmented fiber tracking and automatic segmentation**

194 Figure 2a shows the tracking result of the first subject, including the arcuate fasciculus (AF), cingulum  
195 (C), frontal aslant tract (FAT), inferior fronto-occipital fasciculus (IFOF), inferior longitudinal fasciculus  
196 (ILF), superior longitudinal fasciculus (SLF), and uncinata fasciculus (UF) presented in the left, right,  
197 anterior, and superior views. Only the association pathways in the left hemisphere are shown here to  
198 facilitate comparison. The tractography matches the known anatomical trajectories of the human  
199 association pathways, suggesting the feasibility of the automatic segmentation to obtain clean results

200 without manual intervention. Figure 2b further shows the left arcuate fasciculus of all 44 subjects,  
201 including their test-retest results generated from automatic segmentation. The tractography of the repeat  
202 scan is placed immediately on the right of the first scan. The tracking results show C-shaped bundles  
203 that match the anatomy of the arcuate fasciculus. The tracking did not require manual intervention or  
204 placement of regions. This suggests that high-throughput automatic fiber tracking could be realized to  
205 provide a decent tractography result.

### 206 **Test-retest reliability**

207 Figures 3a and 3b further present the test-retest results of the arcuate fasciculus tractography. We  
208 selected three best (Fig. 3a) and three worst (Fig. 3b) performers from our subject pool, as quantified by  
209 the differences in the volume between the test-retest scans. The tractography in Figure 3a shows high  
210 consistency in the fiber trajectories. The topological pattern of the core bundle is almost identical, though  
211 minor differences can still be observed at the details. Figure 3b shows tractography from the three worst  
212 performers in the test-retest scans. Although at their worst, the overall tractography still also presents  
213 decent consistency. Most of the differences are located in the branches, whereas the core trajectories  
214 are still highly consistent.

215 Figure 3c lists the intraclass correlation (ICC) of shape descriptors for each bundle. The shape descriptors  
216 can be categorized into length metrics (light gray), area metrics (gray), volume metrics (dark gray), and  
217 shape metrics (white). Good reliability ( $ICC \geq 0.75$ ) is labeled by a green circle, and moderate reliability  
218 ( $0.75 > ICC \geq 0.5$ ) is labeled by a yellow circle. Poor reliability ( $ICC < 0.5$ ) is marked by red. Out of  
219 bundle-descriptor entries, 120 of them (57.1%) have good reliability, 76 of them (36.2%) have moderate  
220 reliability, and 14 of them (6.7%) have poor reliability. More than 90% of the scenarios have moderate to  
221 good reliability, suggesting overall good reliability of the shape descriptors. All descriptors have a median  
222 ICC value greater than 0.5, and the length metrics perform the best, with a median value of ICC around

223 0.8. The area and volume metrics are the next, showing the median values of ICC around 0.7~0.8. The  
224 shape metrics moderate to good reliability, with curl and elongation performing the best, and irregularity  
225 the last. There are poor reliability scenarios in radius, trunk volume, and irregularity that requires  
226 precautions. These metrics can have outstanding reliability ( $ICC > 0.9$ ) for some bundles and poor  
227 reliability ( $ICC < 0.5$ ) in the others. This indicates that the application of these three shape descriptors  
228 still requires additional precautions for the use-case scenarios to avoid poor reliability conditions.

### 229 **Normative distribution of shape descriptors and their left-right asymmetry**

230 Figure 4a shows representative examples of large and small metrics values using the left arcuate  
231 fasciculus selected from the subject pool, whereas the median values of the shape descriptors are listed  
232 and color-coded in Fig. 4b. In Figure 4b, the red color represents a relatively higher value compared with  
233 other association pathways. For example, the length of the inferior fronto-occipital fasciculus (IFOF) is  
234 marked by red, suggesting their longest length among all association pathways. Similarly, the frontal  
235 aslant tract (FAT) has the largest diameters, and the left cingulum (C) has the largest surface area. The  
236 left superior longitudinal fasciculus (SLF) has the largest topological irregularity. The median value offers  
237 an overview of the structural characteristics of the association pathways.

238 We further plot the distributions of length and area metrics in Fig.5 for each of the association pathways.  
239 The two circles on the right upper corner represent the test-retest reliability of the measures, as listed in  
240 Fig.3c. Green color indicates good test-retest reliability ( $ICC \geq 0.75$ ), yellowish color indicates moderate  
241 reliability ( $0.75 > ICC \geq 0.5$ ), and red color indicates poor reliability ( $ICC < 0.5$ ). The distributions for the left  
242 side bundle are colored by blue, whereas the right colored by red. Paired t-tests were used to test the  
243 left-right differences. The p-value results are presented with significance marks ( $* < 0.05$ ,  $** < 0.01$ ,  $*** <$   
244  $0.001$ ), and the percentage differences are also calculated by  $100\% \times (a-b)/a$ , where  $a$  is the quantity of  
245 the dominance side. The largest and most significant left dominance can be found in the arcuate

246 fasciculus (AF) in the span, diameter, and radius of its anterior end surface. On the next, superior  
247 longitudinal fasciculus (SLF), cingulum (C), and uncinata fasciculus (UF) show moderately left dominance  
248 at 10~20% in diameter and end surfaces (the poor reliability results in SLF and UF labeled by red circles  
249 are ignored). The left frontal aslant tract (FAT) shows a slightly larger radius of the innervation region at  
250 the superior frontal lobe. In comparison, the inferior fronto-occipital fasciculus (IFOF) and inferior  
251 longitudinal fasciculus (ILF) shows right-dominance only in the radius of the end surfaces with no  
252 significant difference in the diameter. Figure 6 further shows the distributions of area and volume metrics  
253 for the association pathway bundles. The arcuate fasciculus (AF) shows a large left-dominance in area  
254 and volume metrics greater than 50%. On the next, cingulum (C), and uncinata fasciculus (UF) show  
255 moderately left dominance at ~20% in area and volume. The frontal aslant tract (FAT) shows only a  
256 slightly larger volume in the left hemisphere (14.8%). In comparison, inferior longitudinal fasciculus (ILF)  
257 shows moderate right-dominance in the area with no significant difference in the volume. The inferior  
258 fronto-occipital fasciculus (IFOF) shows right-dominance in the area of the anterior end surface. The  
259 superior longitudinal fasciculus (SLF) has a more complicated lateralization profile, with left dominance  
260 in tract area and right dominance at the posterior innervation region and trunk volume. Findings from Figs.  
261 5 and 6 show an overall trend of left-dominance in the arcuate fasciculus (AF), cingulum (C), frontal aslant  
262 tract (FAT), and uncinata fasciculus (UF), and right dominance in the inferior fronto-occipital fasciculus  
263 (IFOF) and inferior longitudinal fasciculus (ILF). The superior longitudinal fasciculus (SLF) has mixed  
264 lateralization with different metrics showing either left or right dominance.

265 Figure 7 shows the distribution of shape metrics for the association pathways. The differences between  
266 left and right distribution are quantified using Cohen's d. While all pathways present significant left-right  
267 differences in different shape metrics. The irregularity metric presents the most significant and largest  
268 left-right asymmetry. The arcuate fasciculus (AF), cingulum (C), superior longitudinal fasciculus (SLF),

269 and uncinata fasciculus (UF) shows substantial left dominance in the irregularity ( $p$ -value  $< 0.001$ ,  $d >$   
270 1.5), while inferior longitudinal fasciculus (ILF) shows right dominance ( $p < 0.001$ ,  $d=1.73$ ). The  
271 lateralization in shape irregularity seems to correlate with the lateralization of the length metrics.

## 272 **Between-subject variations**

273 Figure 8 shows the between-subject variations using the absolute deviation. The absolute deviation was  
274 calculated by the absolute difference from the median to evaluate the dispersion of the shape descriptors  
275 between subjects. The deviation was further divided by the median value of the bundle to facilitate  
276 comparison. Furthermore, the overall median value of all bundles is plotted by a blue vertical line,  
277 whereas the first and third quantiles are plotted by a red line. As shown in Fig. 8, the length, span, and  
278 diameters have small between-subject differences, mostly less than 10% deviations. The variations in  
279 diameter are larger for the right arcuate fasciculus (AF\_R), likely due to its smallest diameter among all  
280 association pathways. The radius and surface also have a similar variation level, with the majority of the  
281 deviations lower than 20%. A much larger between-subject variation can be observed for the area of the  
282 end surfaces, mostly ranged between 10~40% in the absolute deviation. The overall results suggest that  
283 the “layout” of the association pathways seems not to vary a lot across subjects, as shown by low  
284 between-subject variation in length, span, diameter, and radius. In contrast, the innervation region has a  
285 considerable between-subject variation that may account for most of the individual differences in white  
286 matter structure.

## 287 **Discussion**

288 Here we conducted shape analysis on human association pathways and confirmed its reliability in a test-  
289 retest dataset. We derived the distribution of shape descriptors to elucidate lateralization and between-  
290 subject variations. The results revealed an overall left dominance in arcuate fasciculus, cingulum,

291 uncinata, and frontal aslant tract, with the largest lateralization found in the arcuate fasciculus. Cingulum  
292 and uncinata fasciculus showed moderate lateralization in either diameter, area, or volume, while the  
293 frontal aslant tract showed small lateralization. Right dominance was found in inferior fronto-occipital  
294 fasciculus and inferior longitudinal fasciculus. Although there was a widespread left-right asymmetry in  
295 all association pathways, the detail lateralization profile varied substantially across bundles, and not all  
296 bundles share the same lateralization pattern.

297 The lateralization found in this study is not new to the neuroscience field. For example, studies have  
298 shown lateralization in the arcuate fasciculus (Lebel and Beaulieu, 2009; Vernooij et al., 2007) and the  
299 inferior longitudinal fasciculus (Panesar et al., 2018), yet our findings revealed a more sophisticated  
300 profile in lateralization. A bundle could have left dominance in one metric and right dominance in another,  
301 and a comprehensive profile covering all metrics is needed to investigate the asymmetry fully.

302 In addition to lateralization, the between-subject variation quantified in this study gave us a glimpse into  
303 how white matter structures variate across the population. Our analysis showed that the between-  
304 subjects variation was small in length metrics such as length, span, diameter, and radius, whereas the  
305 area of the end surfaces had a much larger variation. While the length and span did not vary much (<  
306 10% deviation), the area of the innervation region had a median deviation of 24%, implying a considerable  
307 variation in how white matter bundle innervates at the cortical surface.

308

309

## 310 **Technical challenges and limitations**

311 There are still limitations in tractography. Good test-retest reliability in shape analysis only implies the  
312 robustness of the algorithm. It does not necessarily guarantee that the results are always correct. The  
313 fiber tracking algorithm still has the issue of false-positive and false-negative results. For deterministic  
314 fiber tracking, false-negative results are more common, as the ability to capture more delicate branches  
315 depends on the spatial resolution and the sensitivity of the data acquisition. There are possibilities that a  
316 minor branch was left undetected in both test and retest scans due to the limitation of acquisitions. Last,  
317 it is noteworthy that we only have 44 subjects included in the analysis. To further investigate between-  
318 subject differences, we are planning a future population-based study to include all 1065 HCP subjects  
319 and to describe the normative variation of white matter structures. Nonetheless, there are encouraging  
320 reproducibility achieved in this study. We showed that a combination of parameter saturation, automatic  
321 track segmentation, and topology-inform pruning could provide good reproducibility. The derived metrics  
322 further achieved moderate to good test-retest reliability. By integrating with shape analysis, diffusion MRI  
323 has a new option for white matter analysis. It can be used in neurological, psychological, and psychiatric  
324 studies to investigate the correlation between white matter architecture correlates and abnormal brain  
325 functions, with a hope to decipher how structure defines brain functions.

## 326 **Acknowledgments**

327 The research reported in this publication was partly supported by NIMH of the National Institutes of Health  
328 under award number R56MH113634. The content is solely the responsibility of the authors and does not  
329 necessarily represent the official views of the National Institutes of Health. This work used the Extreme  
330 Science and Engineering Discovery Environment (XSEDE), which is supported by National Science  
331 Foundation grant number ACI-1548562. Data were provided by the Human Connectome Project, WU-



332 Minn Consortium (Principal Investigators: David Van Essen and Kamil Ugurbil; 1U54MH091657) funded  
333 by the 16 NIH Institutes and Centers that support the NIH Blueprint for Neuroscience Research; and by  
334 the McDonnell Center for Systems Neuroscience at Washington University.

## 335 **References**

- 336 Bullmore, E., Sporns, O., 2009. Complex brain networks: graph theoretical analysis of  
337 structural and functional systems. *Nat Rev Neurosci* 10, 186-198.
- 338 Corouge, I., Gouttard, S., Gerig, G., 2004. Towards a shape model of white matter fiber  
339 bundles using diffusion tensor MRI. 2004 2nd IEEE International Symposium on Biomedical  
340 Imaging: Nano to Macro (IEEE Cat No. 04EX821). IEEE, pp. 344-347.
- 341 Costa, L.d.F.D., Cesar Jr, R.M., 2000. Shape analysis and classification: theory and practice.  
342 CRC Press, Inc.
- 343 DeFelipe, J., 2010. From the connectome to the synaptome: an epic love story. *Science* 330,  
344 1198-1201.
- 345 Fornito, A., Zalesky, A., Breakspear, M., 2015. The connectomics of brain disorders. *Nat Rev*  
346 *Neurosci* 16, 159-172.
- 347 Glasser, M.F., Smith, S.M., Marcus, D.S., Andersson, J.L., Auerbach, E.J., Behrens, T.E.,  
348 Coalson, T.S., Harms, M.P., Jenkinson, M., Moeller, S., Robinson, E.C., Sotiropoulos, S.N.,  
349 Xu, J., Yacoub, E., Ugurbil, K., Van Essen, D.C., 2016. The Human Connectome Project's  
350 neuroimaging approach. *Nat Neurosci* 19, 1175-1187.
- 351 Glzman, T., Bruckert, L., Pestilli, F., Yecies, D.W., Guibas, L.J., Yeom, K.W., 2018.  
352 Framework for shape analysis of white matter fiber bundles. *Neuroimage* 167, 466-477.
- 353 Kitchell, L., Bullock, D., Hayashi, S., Pestilli, F., 2018. Shape Analysis of White Matter Tracts  
354 via the Laplace-Beltrami Spectrum. *International Workshop on Shape in Medical Imaging*.  
355 Springer, pp. 195-206.
- 356 Lebel, C., Beaulieu, C., 2009. Lateralization of the arcuate fasciculus from childhood to  
357 adulthood and its relation to cognitive abilities in children. *Human Brain Mapping* 30, 3563-  
358 3573.
- 359 Otsu, N., 1979. A threshold selection method from gray-level histograms. *IEEE Trans. Sys.,*  
360 *Man., Cyber* 9, 62-66.
- 361 Panesar, S.S., Yeh, F.-C., Jacquesson, T., Hula, W., Fernandez-Miranda, J.C., 2018. A  
362 quantitative tractography study into the connectivity, segmentation and laterality of the human  
363 inferior longitudinal fasciculus. *Frontiers in neuroanatomy* 12, 47.

364 Rheault, F., De Benedictis, A., Daducci, A., Maffei, C., Tax, C.M.W., Romascano, D.,  
365 Caverzasi, E., Morency, F.C., Corrivetti, F., Pestilli, F., Girard, G., Theaud, G., Zemmoura, I.,  
366 Hau, J., Glavin, K., Jordan, K.M., Pomiecko, K., Chamberland, M., Barakovic, M., Goyette, N.,  
367 Poulin, P., Chenot, Q., Panesar, S.S., Sarubbo, S., Petit, L., Descoteaux, M., 2020.  
368 Tractostorm: The what, why, and how of tractography dissection reproducibility. *Hum Brain*  
369 *Mapp* 41, 1859-1874.

370 Schilling, K.G., Yeh, F.C., Nath, V., Hansen, C., Williams, O., Resnick, S., Anderson, A.W.,  
371 Landman, B.A., 2019. A fiber coherence index for quality control of B-table orientation in  
372 diffusion MRI scans. *Magn Reson Imaging* 58, 82-89.

373 Sporns, O., Tononi, G., Kotter, R., 2005. The human connectome: A structural description of  
374 the human brain. *PLoS Comput Biol* 1, e42.

375 Towns, J., Cockerill, T., Dahan, M., Foster, I., Gaither, K., Grimshaw, A., Hazlewood, V.,  
376 Lathrop, S., Lifka, D., Peterson, G.D., 2014. XSEDE: accelerating scientific discovery.  
377 *Computing in science & engineering* 16, 62-74.

378 Vernooij, M.W., Smits, M., Wielopolski, P., Houston, G., Krestin, G.P., van der Lugt, A., 2007.  
379 Fiber density asymmetry of the arcuate fasciculus in relation to functional hemispheric  
380 language lateralization in both right-and left-handed healthy subjects: a combined fMRI and  
381 DTI study. *Neuroimage* 35, 1064-1076.

382 Yeh, F.C., Panesar, S., Barrios, J., Fernandes, D., Abhinav, K., Meola, A., Fernandez-Miranda,  
383 J.C., 2019. Automatic Removal of False Connections in Diffusion MRI Tractography Using  
384 Topology-Informed Pruning (TIP). *Neurotherapeutics* 16, 52-58.

385 Yeh, F.C., Panesar, S., Fernandes, D., Meola, A., Yoshino, M., Fernandez-Miranda, J.C.,  
386 Vettel, J.M., Verstynen, T., 2018. Population-averaged atlas of the macroscale human  
387 structural connectome and its network topology. *Neuroimage* 178, 57-68.

388 Yeh, F.C., Verstynen, T.D., Wang, Y., Fernandez-Miranda, J.C., Tseng, W.Y., 2013.  
389 Deterministic diffusion fiber tracking improved by quantitative anisotropy. *PLoS ONE* 8,  
390 e80713.

391 Yeh, F.C., Wedeen, V.J., Tseng, W.Y., 2010. Generalized q-sampling imaging. *IEEE Trans*  
392 *Med Imaging* 29, 1626-1635.

393

394

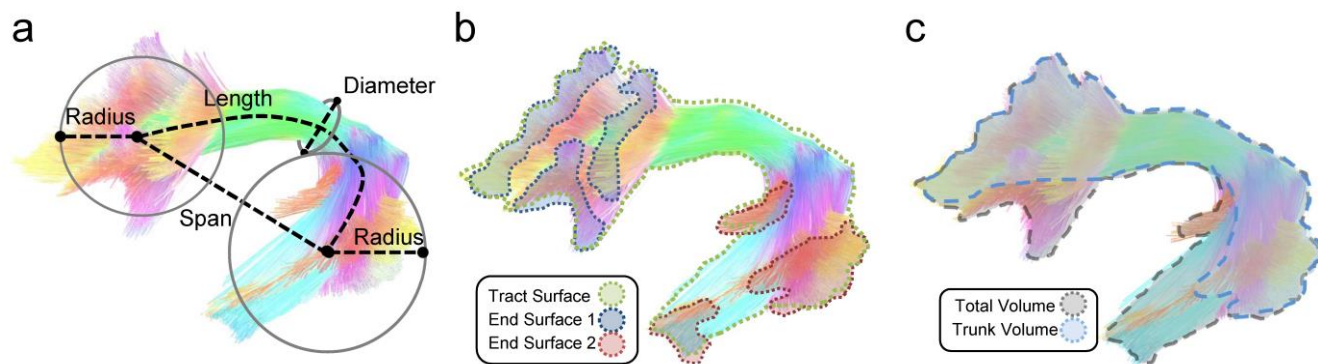

395

396 Figure 1. Shape analysis of a bundle and representative examples illustrating high and low values in the  
397 shape descriptors. (a) The length metrics include length, span, diameter, and radius of the innervation  
398 region. The length measures the length of the bundle trajectory, whereas the span measures the absolute  
399 distance between two ends of the bundle. The diameter estimates the average bundle diameter. The  
400 radius uses a circular model to estimate the coverage of the innervation regions. (b) The area metrics  
401 include total track surface area and area of the two end surfaces. Each fiber bundle has two end surfaces,  
402 and their area will be quantified separately. (c) The volume metrics include total volume and trunk volume.

403

404

405

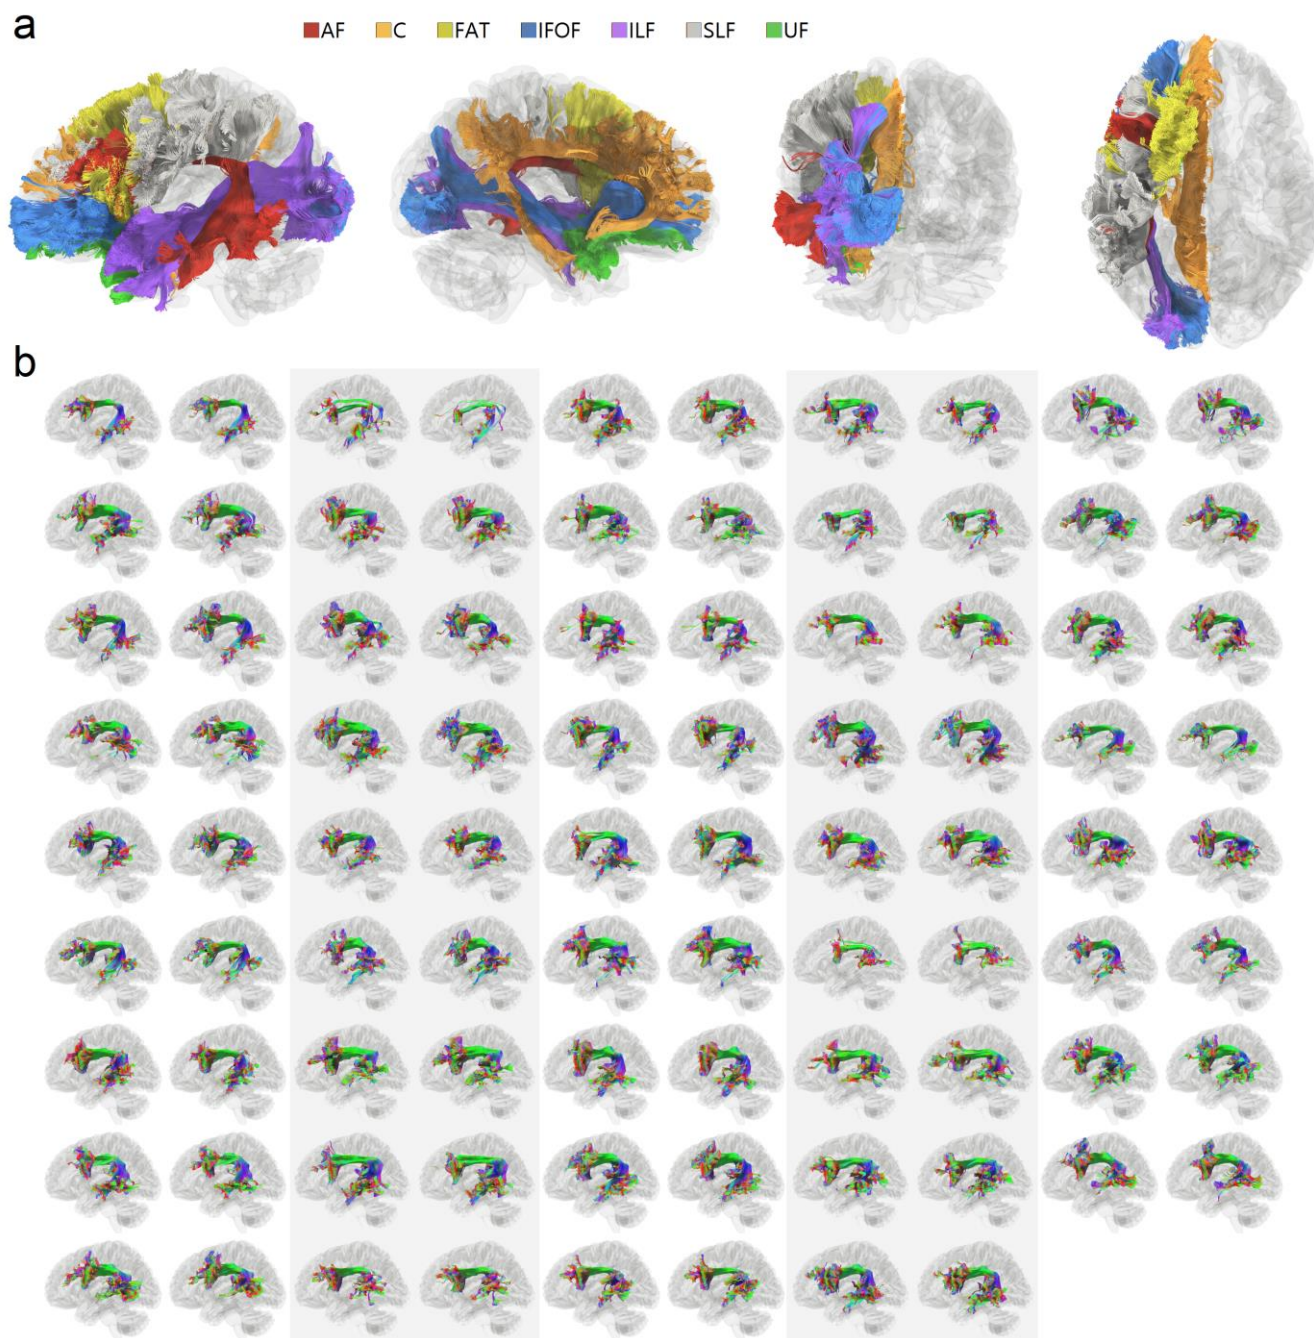

406

407 Figure 2. Tractography of human association pathways generated using augmented fiber tracking and

408 automatic segmentation. (a) Seven association pathways in the left hemisphere of a subject are

409 automatically tracked and segmented. The process does not require a manual assignment of regions or

410 editing. The results are consistent with the known neuroanatomical structures. (b) The result of arcuate

411 fasciculus tractography of all test-retest scans ( $n=44 \times 2$ ) mapped using augmented fiber tracking and

412 automatic segmentation. The retest results are placed on the right of the first scan. All segmentation  
413 results show consistent C-shaped bundles. The test-retest results are similar, suggesting the feasibility  
414 of the method for high throughput analysis.

415

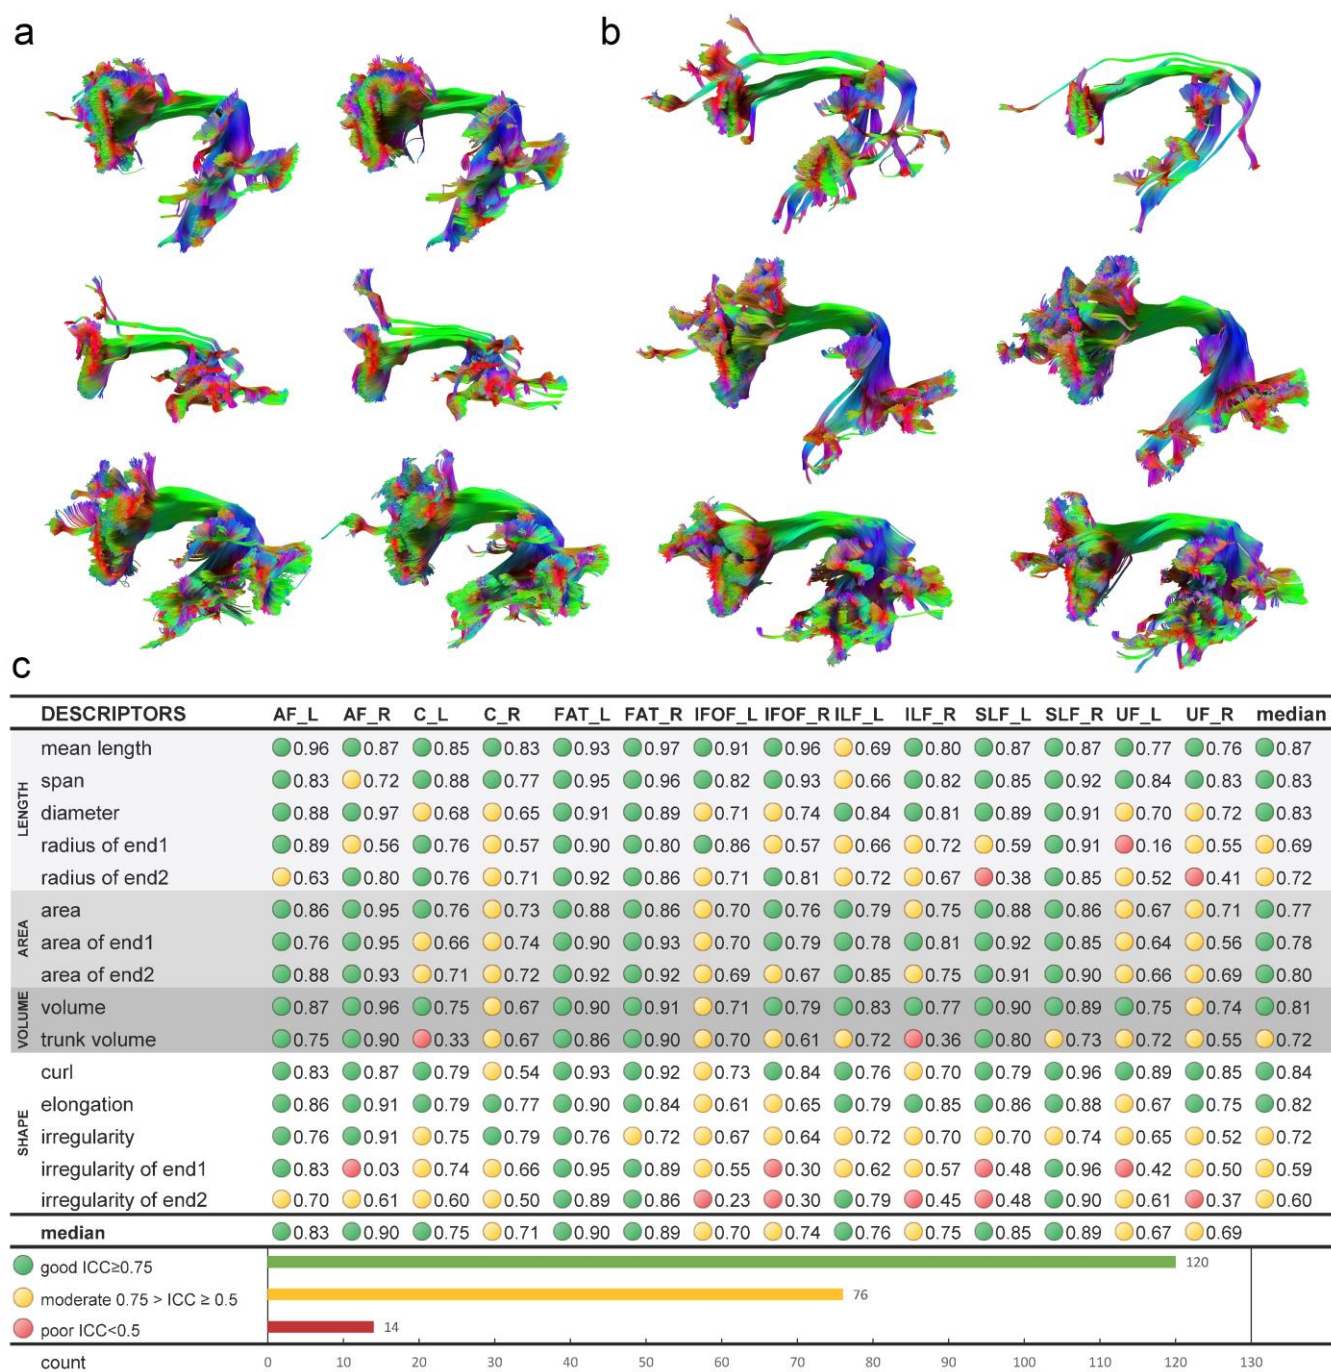

416

417 Figure 3. Reproducibility of tractography and reliability of the shape descriptors. (a) Three subjects with  
 418 the best performing test-retest results are selected for their small differences in volume. The tractography  
 419 from test and retest scans is of high similarity, while the unique structural characteristics of each subject  
 420 are preserved. (b) Three subjects with the worst-performing test-retest results are selected as a

421 comparison. Even at its worst, the fiber tracking and segmentation still achieve decent consistency  
422 between test-retest scans and preserves the structural characteristics of each subject. (C) The test-retest  
423 reliability of the shape descriptors is quantified by intraclass correlation (ICC). The majority of the shape  
424 descriptors show moderate ( $>0.5$ ) to good ( $>0.75$ ) reliability. The median ICC values for all descriptors  
425 are greater than 0.5, while poor reliability ( $<0.5$ ) still presents in around 6% of the application scenarios.

426

427

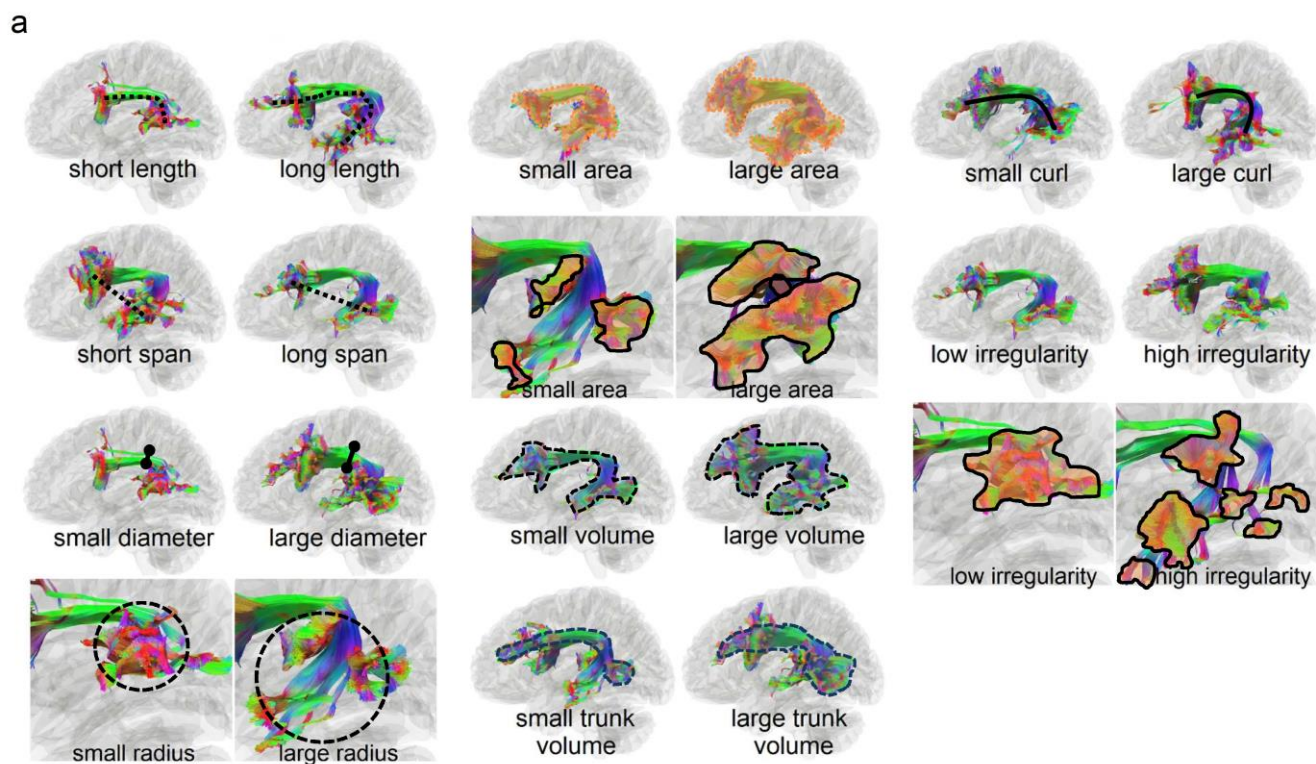

b

| DESCRIPTORS                                     | AF_L  | AF_R  | C_L   | C_R   | FAT_L | FAT_R | IFOF_L | IFOF_R | ILF_L | ILF_R | SLF_L | SLF_R | UF_L | UF_R |
|-------------------------------------------------|-------|-------|-------|-------|-------|-------|--------|--------|-------|-------|-------|-------|------|------|
| mean length (mm)                                | 125.6 | 133.7 | 111.5 | 107.8 | 79.2  | 76.0  | 173.2  | 170.8  | 122.3 | 119.3 | 79.2  | 97.1  | 65.0 | 64.5 |
| span (mm)                                       | 62.3  | 86.9  | 77.0  | 74.3  | 62.4  | 58.7  | 131.1  | 140.4  | 102.2 | 100.9 | 44.0  | 60.3  | 24.4 | 26.9 |
| diameter (mm)                                   | 14.8  | 7.8   | 16.2  | 14.3  | 17.8  | 18.2  | 12.0   | 12.0   | 13.4  | 13.2  | 16.6  | 15.3  | 15.9 | 14.2 |
| radius of end1 (mm)                             | 26.7  | 13.1  | 38.6  | 24.7  | 21.0  | 21.2  | 18.5   | 23.1   | 28.6  | 32.2  | 26.4  | 16.3  | 17.5 | 22.1 |
| radius of end2 (mm)                             | 20.3  | 18.7  | 39.5  | 29.4  | 17.2  | 15.4  | 26.3   | 25.2   | 19.5  | 22.6  | 28.3  | 24.2  | 22.2 | 15.0 |
| area (10 <sup>3</sup> mm <sup>2</sup> )         | 14.4  | 6.0   | 15.5  | 12.9  | 11.3  | 10.7  | 13.5   | 13.6   | 12.4  | 14.1  | 12.0  | 11.6  | 7.8  | 5.9  |
| area of end1 (10 <sup>3</sup> mm <sup>2</sup> ) | 2.6   | 0.8   | 2.7   | 1.8   | 2.8   | 3.1   | 1.4    | 1.8    | 1.9   | 2.0   | 1.9   | 1.9   | 3.1  | 2.6  |
| area of end2 (10 <sup>3</sup> mm <sup>2</sup> ) | 2.7   | 1.0   | 3.4   | 2.4   | 3.0   | 2.9   | 2.8    | 2.7    | 1.8   | 1.6   | 2.7   | 3.3   | 3.1  | 2.7  |
| volume (10 <sup>3</sup> mm <sup>3</sup> )       | 21.2  | 6.4   | 22.5  | 18.1  | 20.1  | 20.1  | 20.4   | 19.2   | 17.4  | 16.5  | 16.8  | 18.2  | 13.0 | 9.9  |
| trunk volume (10 <sup>3</sup> mm <sup>3</sup> ) | 13.9  | 5.1   | 7.4   | 10.2  | 19.1  | 17.6  | 14.2   | 13.8   | 8.1   | 6.8   | 8.9   | 13.4  | 10.7 | 8.0  |
| curl                                            | 2.0   | 1.6   | 1.4   | 1.4   | 1.3   | 1.3   | 1.3    | 1.2    | 1.2   | 1.2   | 1.8   | 1.6   | 2.6  | 2.4  |
| elongation                                      | 8.3   | 16.7  | 6.7   | 7.4   | 4.4   | 4.3   | 14.4   | 14.8   | 9.2   | 9.1   | 4.7   | 6.4   | 4.0  | 4.4  |
| irregularity                                    | 5.0   | 3.6   | 5.7   | 5.2   | 4.9   | 5.0   | 4.1    | 4.1    | 4.9   | 5.5   | 6.1   | 5.0   | 4.7  | 4.1  |
| irregularity of end1                            | 0.9   | 0.6   | 1.8   | 1.0   | 0.5   | 0.4   | 0.9    | 0.9    | 1.3   | 1.7   | 1.0   | 0.5   | 0.4  | 0.6  |
| irregularity of end2                            | 0.5   | 1.1   | 1.4   | 1.1   | 0.3   | 0.3   | 0.7    | 0.7    | 0.7   | 0.9   | 0.9   | 0.6   | 0.5  | 0.3  |

428

429 Figure 4. (a) Representative cases of shape descriptors are shown using the left arcuate fasciculus as  
 430 an example. (b) Median values of shape descriptors across 44 subjects are listed for each association  
 431 pathway. The red colors are those with relatively large values in comparison with other pathways.



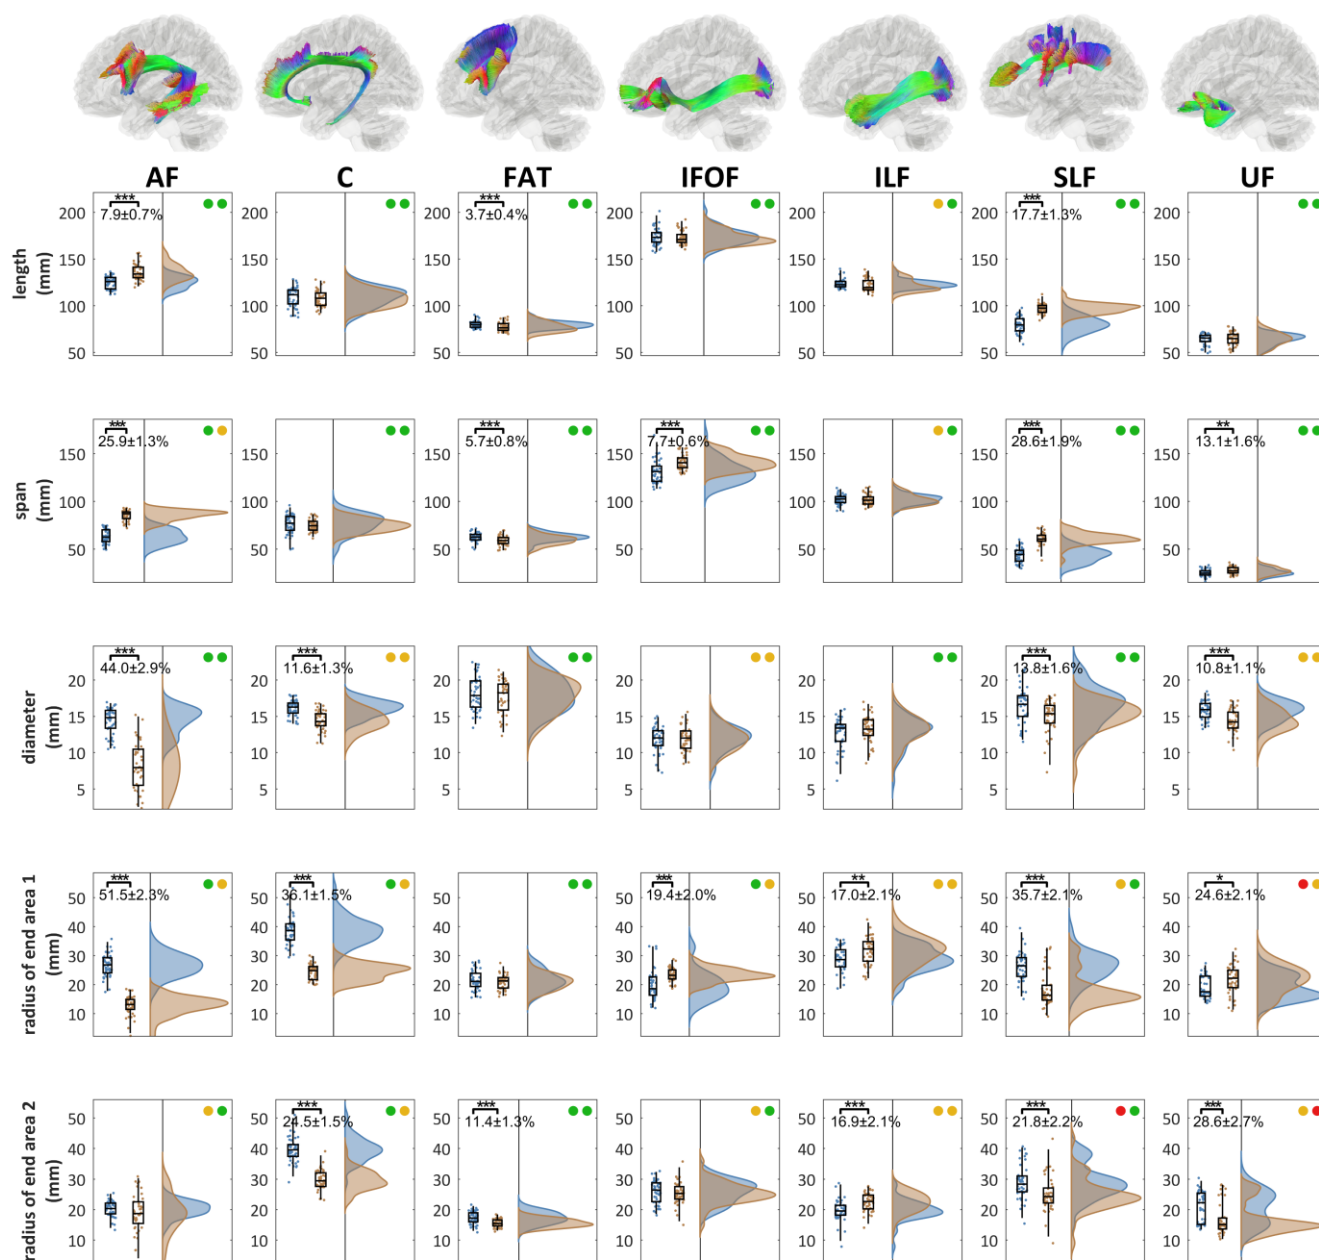

432

433 Figure 5. The distribution of the length metrics and their left-right differences in the association pathways.

434 The association pathways present different significance level of the left-right differences (p-value: \*\*\* <

435 0.001, \*\* < 0.01, \* < 0.05). The test-retest reliability of the metrics for the left and right bundle is presented

436 by colored circles (green: ICC ≥ 0.75, yellow: 0.75 > ICC ≥ 0.5, red: ICC < 0.5). The end area 1 is located at

437 the anterior end of the bundles (inferior end for frontal aslant tract). AF, C, FAT, SLF, and UF present an  
438 overall left dominance in either the diameter or radius, whereas IFOF and ILF present right dominance.

439

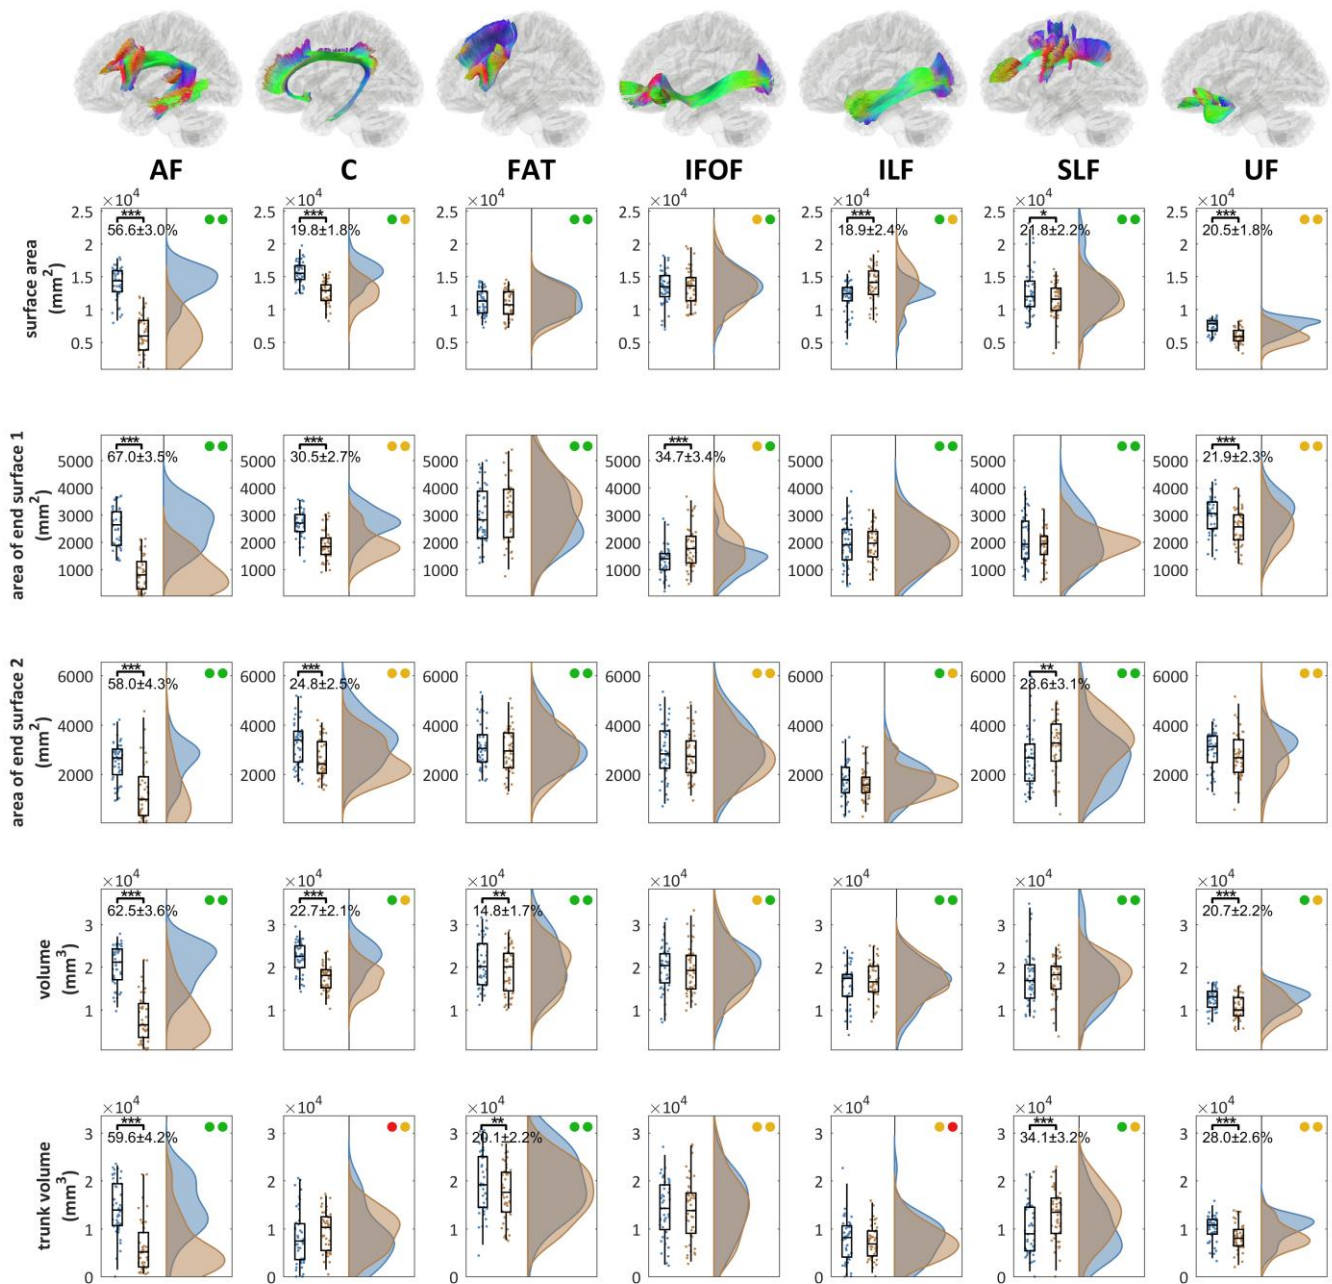

440

441 Figure 6. The distributions of the area and volume metrics and their left-right differences in the association  
 442 pathways. The left-right differences are tested (p-value: \*\*\* < 0.001, \*\* < 0.01, \* < 0.05). The test-retest  
 443 reliability of the metrics for the left and right bundle is presented by colored circles (green: ICC ≥ 0.75,  
 444 yellow: 0.75 > ICC ≥ 0.5, red: ICC < 0.5). The end area 1 is located at the anterior end of the bundles (inferior

445 end for frontal aslant tract). AF, C, FAT, and UF shows significant left dominance in either area or volume  
446 metrics, whereas IFOF and ILF show significant right dominance. SLF presents a mixed lateralization  
447 profile with either right or left dominance in different metrics.

448

449

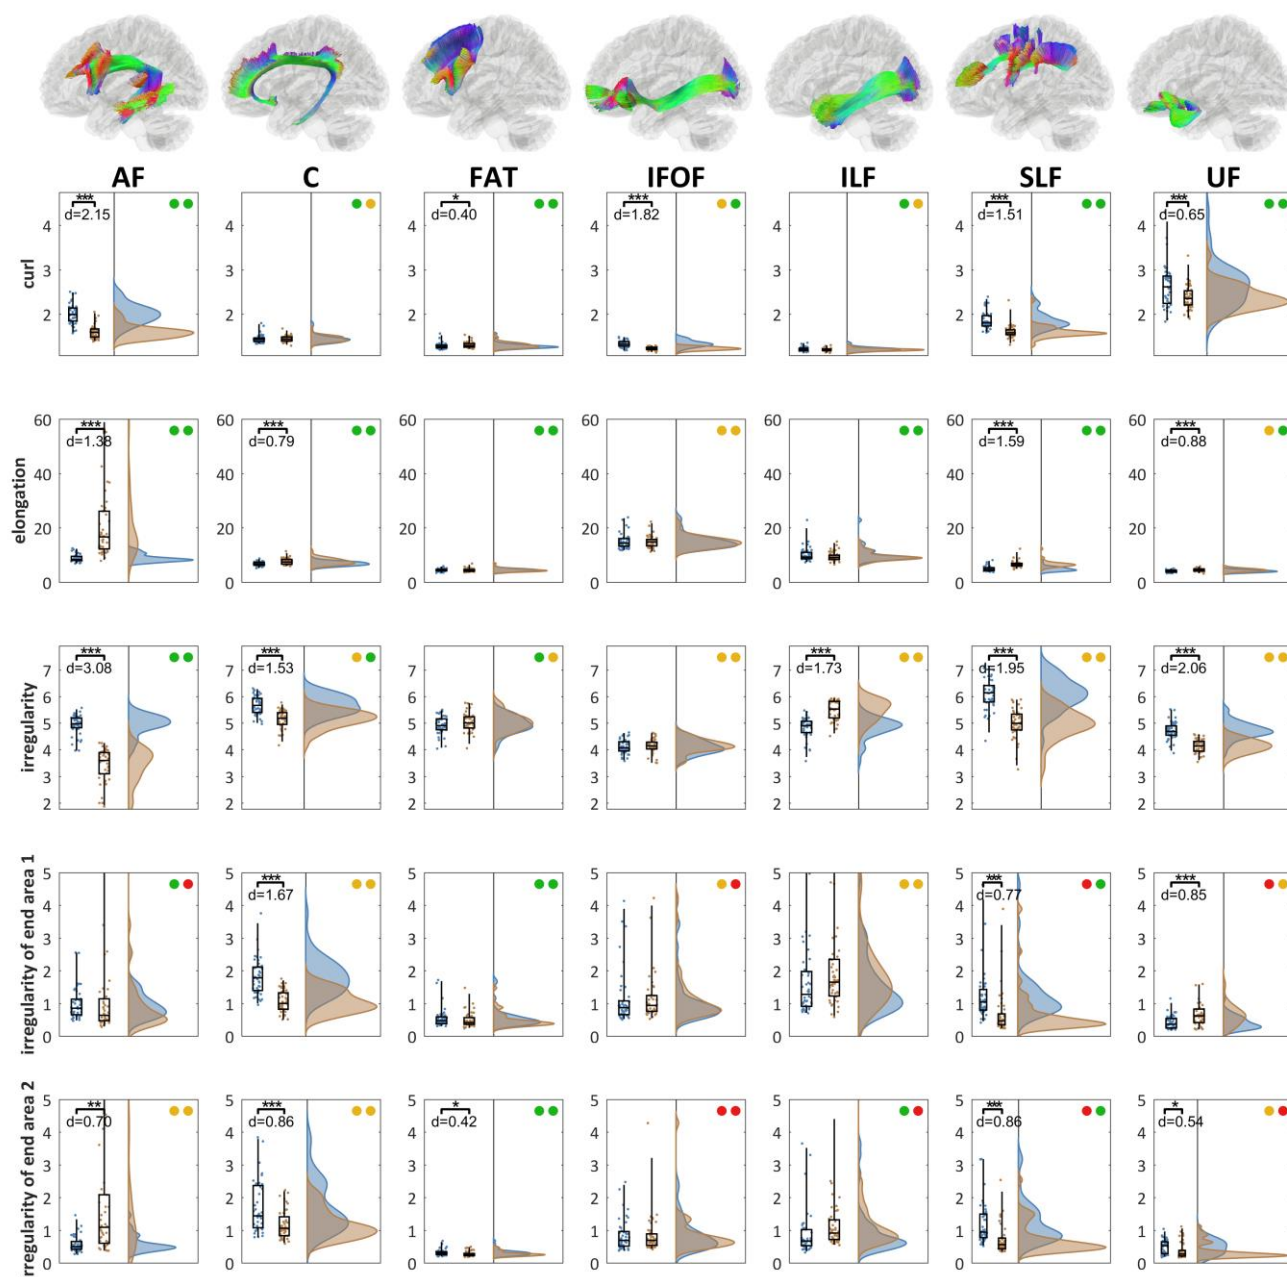

450

451 Figure 7. The distributions of the shape metrics and their left-right differences in the association pathways.  
 452 The left-right differences are tested ( $p$ -value: \*\*\* < 0.001, \*\* < 0.01, \* < 0.05) and effect size (Cohen's  $d$ )  
 453 with test-retest reliability presented as colored circles (green:  $ICC \geq 0.75$ , yellow:  $0.75 > ICC \geq 0.5$ , red:  
 454  $ICC < 0.5$ ). All pathways present significant lateralization at different shape metrics. The overall irregularity

455 shows the large left-dominance at AF, C, SLF, UF, and right dominance at ILF, suggesting their prominent  
456 left-right differences in bundle topology.

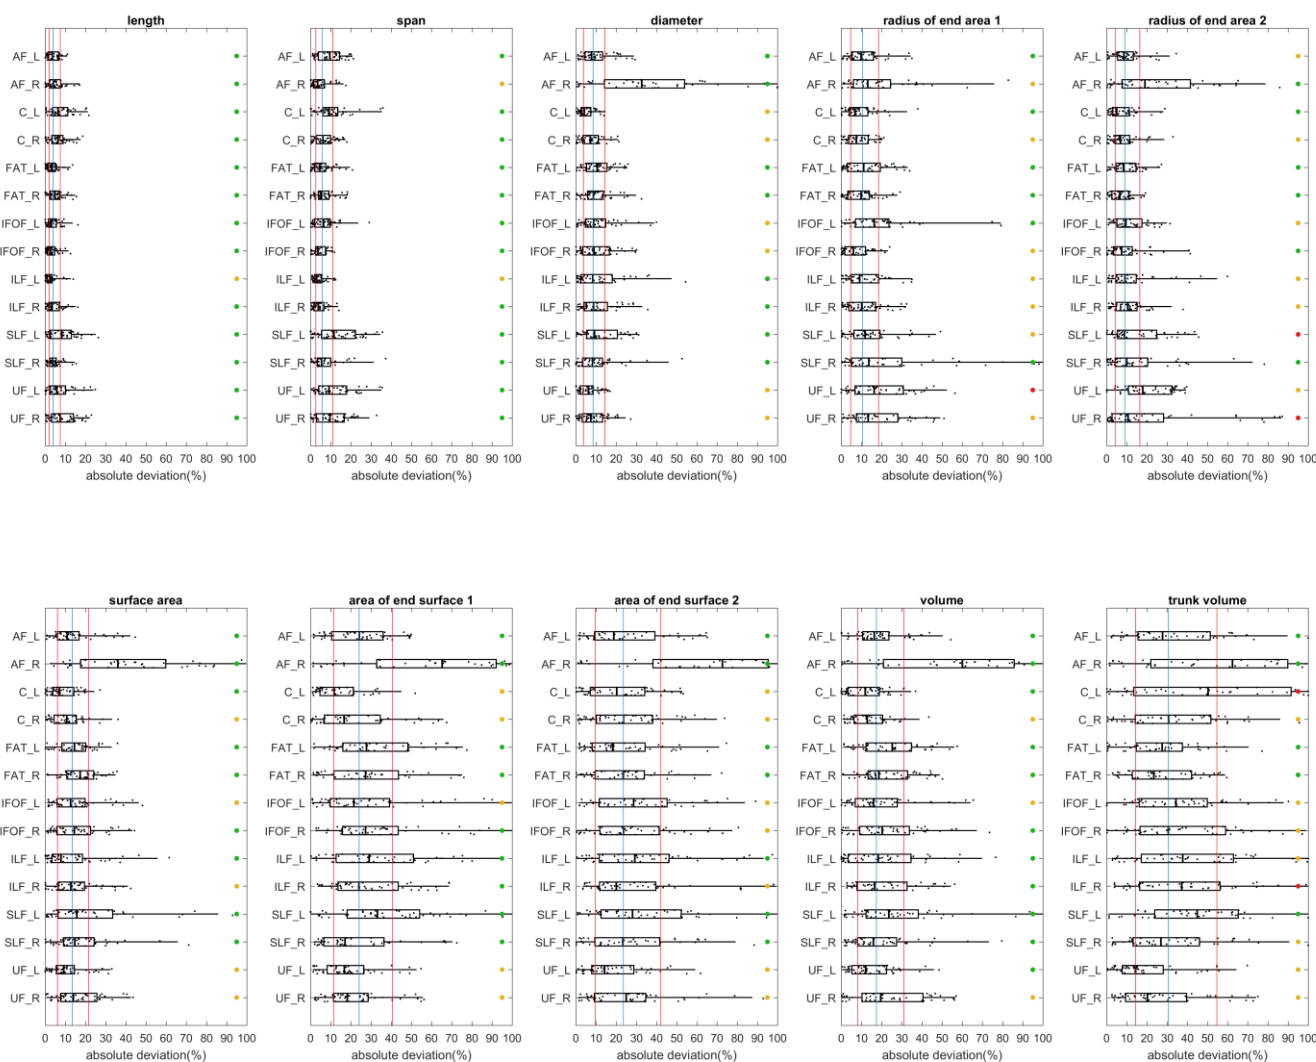

457

458 Figure 8. Between-subject variations of the length, area, and volume metrics in the association pathways.

459 The variations are quantified by absolute deviation. The blue vertical line marks the median of deviation

460 values of all bundles, whereas the two red vertical line marks the first and third quartiles. The test-retest

461 reliability is labeled by colored circles (green:  $ICC \geq 0.75$ , yellow:  $0.75 > ICC \geq 0.5$ , red:  $ICC < 0.5$ ). All length

462 metrics have relatively smaller between-subject variation, whereas the area and volume metrics show a

463 larger between-subject variation, particularly the area of the end surfaces showing greater than >20%

464 deviation.

**Table 1: List of shape descriptors and their definition**

| Descriptors                        | Definition                                                                                         |
|------------------------------------|----------------------------------------------------------------------------------------------------|
| Length (mm)                        | $\frac{1}{n} \sum_{i=1}^{i=n} \sum_{t=1}^{t=m_i-1} \ v_i(t) - v_i(t+1)\ _2$                        |
| Span (mm)                          | $\sum_{i=1}^{i=n} \ v(1) - v(m_i)\ _2$                                                             |
| Diameter (mm)                      | $2 \sqrt{\frac{\text{volume}}{\pi \times \text{length}}}$                                          |
| Radius (mm)                        | $\frac{1.5}{N_e} \sum_{i=1}^{i=N_e} \left\  E_i - \frac{1}{N_e} \sum_{j=1}^{j=N_e} E_j \right\ _2$ |
| Surface Area (mm <sup>2</sup> )    | $N_s \times \text{voxel spacing}^2$                                                                |
| Volume (mm <sup>3</sup> )          | $N \times \text{voxel volume}$                                                                     |
| Trunk Volume (mm <sup>3</sup> )    | $N_t \times \text{voxel volume}$                                                                   |
| Curl                               | $\frac{\text{length}}{\text{span}}$                                                                |
| Elongation                         | $\frac{\text{length}}{\text{diameter}}$                                                            |
| Irregularity of the bundle surface | $\frac{\text{surface area}}{\pi \times \text{diameter} \times \text{length}}$                      |
| Irregularity of the end surface    | $\frac{\pi \times \text{radius}^2}{\text{area of the end surface}}$                                |

Length metrics    Area metrics    Volume metrics

Bundle: trajectory form= $\{v_i(t) \mid i = 1,2,3, \dots n\}$ , voxelized form= $\{V_i \mid i = 1,2,3, \dots N\}$

End surface: voxelized form= $\{E_i \mid i = 1,2,3, \dots N_e\}$

$N_t$  is the number of "trunk bundle" voxels.

$N_s$  is the number of tract surface voxels.
